# Supplementary material
Source: PubMed Central journal article supplement (PMC7030193)
Supplement: NIHMS1551531-supplement-1.pdf [file NIHMS1551531-supplement-1.pdf]

## Appendix A. Supplementary Data



Figure A.8: BBB scores for control groups. All data points are mean  $\pm$  SEM,  $n = 7$  or  $8$ . No control groups were different from the no treatment control. Lack of significance determined by repeated measures ANOVA ( $\alpha = 0.05$ , time is within-subjects variable) and Tukey's *post-hoc*,  $p > 0.05$ .



Figure A.9: Hindlimb duty factor (A) and right paw placement accuracy (B) for control groups. All data points are mean  $\pm$  SEM,  $n = 7$  or  $8$ . No control groups were different from the no treatment control. Lack of significance determined by repeated measures ANOVA ( $\alpha = 0.05$ , time is within-subjects variable) and Tukey's *post-hoc*,  $p > 0.05$ .



Figure A.10: Forelimb duty factor (A) and left paw placement accuracy (B) were not affected by our injury model. All data points are mean  $\pm$  SEM,  $n = 7$  or  $8$ . Lack of significance determined by repeated measures ANOVA ( $\alpha = 0.05$ , time is within-subjects variable) and Tukey's *post-hoc*,  $p > 0.05$ .



Figure A.11: Analysis of retrograde tracer uptake indicates that subcutaneous maturation of NSC-seeded scaffolds, both with and without ISP, resulted in improvements vs. a negative control. Mean  $\pm$  SD,  $n = 7$  or  $8$ . Significance determined by ANOVA with Tukey's *post-hoc*,  $\alpha = 0.05$ .
